# Supplementary material for: Association of Serum Ferritin and the Development of Metabolic Syndrome in Middle-Aged Korean Men: A 5-year follow-up study
Source: PubMed Central journal article supplement — Diabetes Care. 2012 Nov 14;35(12):2521–6. doi: 10.2337/dc12-0543 (PMC3507565; doi:10.2337/dc12-0543), 2012-11-14
Supplement: supp_dc12-0543v120543_DC120543SupplementaryData.pdf [file supp_dc12-0543v120543_DC120543SupplementaryData.pdf]

SUPPLEMENTARY DATA

**Supplementary Table 1.** . Baseline characteristics of the study participants according to the number of baseline MetS-free components (N=13,084)

| Characteristics               | Number of the baseline MetS components |                  |                  | P-for trend* |
|-------------------------------|----------------------------------------|------------------|------------------|--------------|
|                               | 0 (N=4,634)                            | 1 (N=4,901)      | 2 (N=3,549)      |              |
| Total person-year             | 17,556.9                               | 17,424.5         | 10,937.9         |              |
| Average person-year           | 3.79 ± (1.39)                          | 3.55 ± (1.48)    | 3.08 ± (1.53)    | <0.001       |
| Age (years)                   | 42.5 ± (6.2)                           | 43.9 ± (6.4)     | 44.5 ± (6.2)     | <0.001       |
| BMI (kg/m <sup>2</sup> )      | 22.8 ± (2.2)                           | 24.0 ± (2.3)     | 25.2 ± (2.4)     | <0.001       |
| WC (cm)                       | 79.4 ± (6.0)                           | 82.9 ± (6.4)     | 86.2 ± (6.7)     | <0.001       |
| Systolic BP (mmHg)            | 105.8 ± (9.4)                          | 111.8 ± (12.6)   | 117.8 ± (14.6)   | <0.001       |
| Diastolic BP (mmHg)           | 72.9 ± (6.7)                           | 77.4 ± (8.6)     | 81.4 ± (9.8)     | <0.001       |
| Total cholesterol (mg/dL)     | 186.1 ± (28.5)                         | 195.6 ± (30.8)   | 200.0 ± (32.0)   | <0.001       |
| Triglyceride (mg/dL)          | 92 (72-115)                            | 121 (90-159)     | 159 (116-206)    | <0.001       |
| HDL-cholesterol (mg/dL)       | 54.5 ± (9.9)                           | 51.3 ± (10.3)    | 48.5 ± (9.5)     | <0.001       |
| LDL-cholesterol (mg/dL)       | 109.6 ± (25.4)                         | 115.7 ± (26.2)   | 117.3 ± (27.0)   | <0.001       |
| Fasting serum glucose (mg/dL) | 91.0 ± (5.3)                           | 97.0 ± (13.7)    | 102.0 ± (18.6)   | <0.001       |
| HOMA-IR                       | 1.6 (1.3-2.0)                          | 1.9 (1.5-2.4)    | 2.2 (1.8-2.9)    | <0.001       |
| Insulin (uU/dL)               | 7.5 ± (2.5)                            | 8.5 ± (3.0)      | 9.7 ± (3.5)      | <0.001       |
| Serum creatinine (mg/dL)      | 1.12 ± (0.10)                          | 1.13 ± (0.11)    | 1.14 ± (0.10)    | <0.001       |
| hsCRP (mg/L)                  | 0.04 (0.02-0.08)                       | 0.05 (0.03-0.10) | 0.07 (0.04-0.13) | 0.001        |
| WBC (×10 <sup>9</sup> /L)     | 6.0 ± (1.5)                            | 6.3 ± (1.5)      | 6.6 ± (1.6)      | <0.001       |
| GGT (U/L)                     | 22 (16-32)                             | 29 (20-45)       | 36 (25-57)       | <0.001       |
| AST (U/L)                     | 22 (19-26)                             | 23 (20-27)       | 25 (21-29)       | <0.001       |
| ALT (U/L)                     | 21 (16-27)                             | 24 (18-33)       | 28 (21-38)       | <0.001       |
| Ferritin (mg/dL)              | 104.2 ± (57.9)                         | 112.3 ± (62.6)   | 123.6 ± (71.9)   | <0.001       |
| TIBC (µg/dL)                  | 297.9 ± (35.7)                         | 307.8 ± (36.2)   | 312.9 ± (37.2)   | <0.001       |
| Hemoglobin (g/dL)             | 15.4 ± (0.9)                           | 15.6 ± (0.9)     | 15.7 ± (0.9)     | <0.001       |
| Iron (µg/dL)                  | 129.9 ± (47.4)                         | 129.6 ± (47.1)   | 129.2 ± (48.3)   | 0.596        |
| Transferrin saturation (%)    | 44.1 ± (16.6)                          | 42.6 ± (16.0)    | 41.8 ± (16.2)    | <0.001       |

SUPPLEMENTARY DATA

|                         |      |      |      |        |
|-------------------------|------|------|------|--------|
| Current smoker (%)      | 38.3 | 40.7 | 43.1 | 0.001  |
| Alcohol intake (%)      | 9.4  | 13.6 | 16.2 | <0.001 |
| Regular exercise (%)    | 18.5 | 18.3 | 17.7 | 0.375  |
| Diabetes mellitus (%)   | 0.2  | 2.3  | 5.9  | <0.001 |
| Hypertension (%)        | 1.3  | 13.7 | 28.4 | <0.001 |
| Development of MetS (%) | 3.7  | 14.3 | 35.3 | <0.001 |

Data are means (standard deviation), medians (interquartile range), or percentages.

\**P*-value by ANOVA-test for continuous variables and Chi square test for categorical variables.

**Supplementary Table 2.** Adjusted Hazard ratios (HRs) and 95% confidence intervals (CI) for the incidence of MetS by quintile groups of serum ferritin level according to clinically relevant subgroups.

| Subgroup                                    | <b>*Adjusted Hazard ratios (HRs) and 95% confidence intervals (CI)</b> |                    |                    |                    |                    |             |
|---------------------------------------------|------------------------------------------------------------------------|--------------------|--------------------|--------------------|--------------------|-------------|
|                                             | Quintile 1                                                             | Quintile 2         | Quintile 3         | Quintile 4         | Quintile 5         | P for trend |
| Blood pressure < 130/85 mmHg (n=10,465)     | 1.00 (reference)                                                       | 1.16 (0.92 - 1.46) | 1.09 (0.86 - 1.38) | 1.30 (1.03 - 1.64) | 1.64 (1.31 - 2.05) | 0.001       |
| Fasting serum glucose < 100 mg/dL (n=9,779) | 1.00 (reference)                                                       | 1.34 (1.05 - 1.70) | 1.21 (0.95 - 1.55) | 1.39 (1.10 - 1.77) | 1.58 (1.25 - 2.00) | 0.009       |
| Triglyceride < 150 mg/dL (n=9,584)          | 1.00 (reference)                                                       | 1.05 (0.80 - 1.37) | 1.09 (0.84 - 1.43) | 1.39 (1.08 - 1.80) | 1.51 (1.17 - 1.96) | 0.003       |
| HDL-cholesterol > 40 mg/dL (n=12,103)       | 1.00 (reference)                                                       | 1.29 (1.04 - 1.61) | 1.33 (1.07 - 1.65) | 1.53 (1.23 - 1.89) | 1.87 (1.52 - 2.30) | <0.001      |
| WC <90 cm (n=11,490)                        | 1.00 (reference)                                                       | 1.18 (0.94 - 1.48) | 1.22 (0.98 - 1.53) | 1.31 (1.05 - 1.64) | 1.54 (1.23 - 1.92) | <0.001      |
| HOMA-IR <75th percentile (n=9,880)          | 1.00 (reference)                                                       | 1.18 (0.91 - 1.53) | 1.10 (0.84 - 1.43) | 1.37 (1.06 - 1.77) | 1.66 (1.29 - 2.15) | <0.001      |
| AST <75th percentile (n=9,945)              | 1.00 (reference)                                                       | 1.24 (0.98 - 1.55) | 1.15 (0.92 - 1.45) | 1.27 (1.01 - 1.60) | 1.52 (1.21 - 1.91) | 0.002       |
| GGT <75th percentile (n=9,658)              | 1.00 (reference)                                                       | 1.02 (0.81 - 1.30) | 0.87 (0.68 - 1.11) | 1.16 (0.91 - 1.47) | 1.41 (1.11 - 1.78) | 0.014       |

\* Adjusting for age, WBC, GGT, log(hsCRP), HOMA-IR, serum creatinine, TIBC, current smoking status, regular exercise, alcohol intake, hypertension and diabetes mellitus.

The 75th percentile for HOMA-IR, AST and GGT was 2.416, 28 and 43, respectively.
